# Supplementary material
Source: publisher figshare collection journal article supplement (https://frontiersin.figshare.com/ndownloader/files/13722836)
Supplement: Supplementary file [file 13722836]

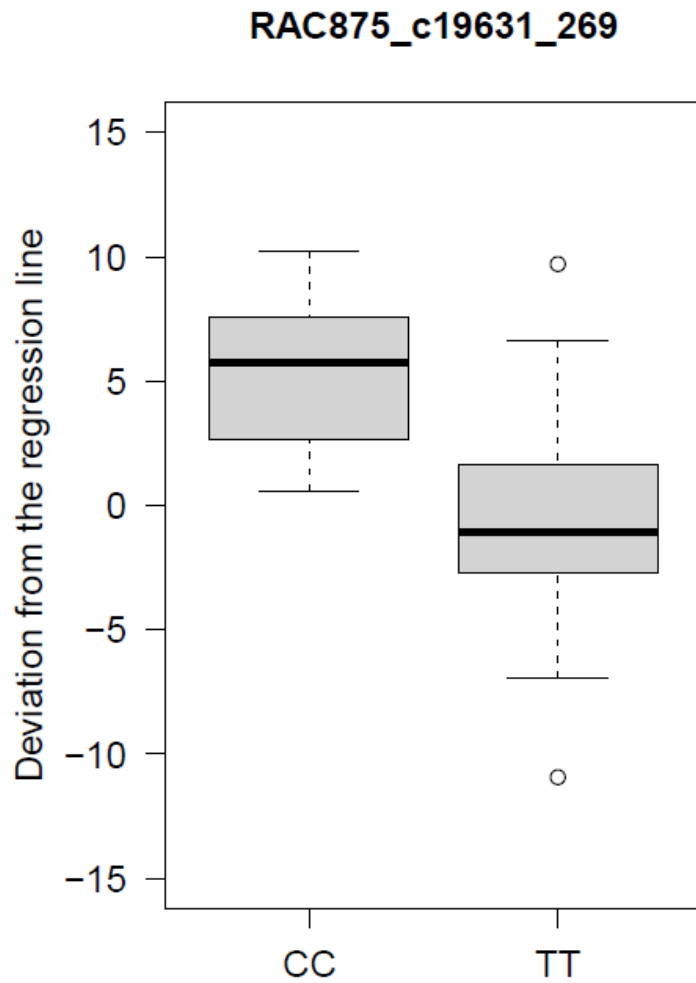

**Suppl. figure 7:** Boxplots of genotype means for the deviation from the regression line based on number of kernels per ear for genotypes with the CC or TT allele at the QTL marker RAC875\_c19631\_269.
